# Supplementary material for: The hepatic circadian clock fine-tunes the lipogenic response to feeding through RORα/γ
Source: PubMed Central journal article supplement — Genes Dev. 2017 Jun 15;31(12):1202–11. doi: 10.1101/gad.302323.117 (PMC5558923; doi:10.1101/gad.302323.117), 2017-06-15
Supplement: supp_gad.302323.117_Supplemental_Fig_S1.pdf [file supp_gad.302323.117_Supplemental_Fig_S1.pdf]

## Figure S1

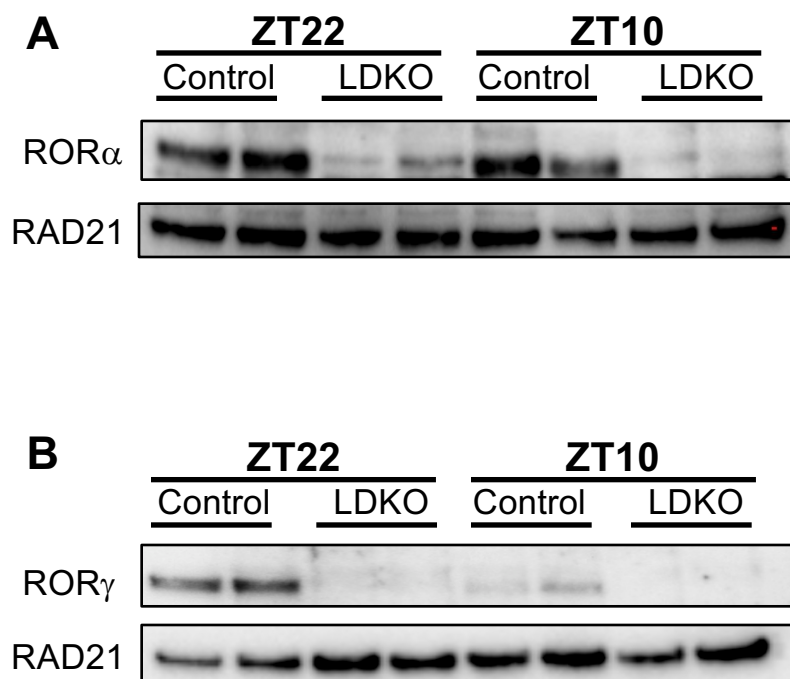

**Supplemental Fig. 1. ROR knockout was confirmed by western blot.** (A) Western blot of ROR $\alpha$ , and loading control RAD21 in livers of *Rora*<sup>fl/fl</sup>/*Rorc*<sup>fl/fl</sup> mice injected with GFP (control) and Cre (KO), harvested at ZT22 and ZT10. (B) Western blot of ROR $\gamma$ , and loading control RAD21 in livers of *Rora*<sup>fl/fl</sup>/*Rorc*<sup>fl/fl</sup> mice injected with GFP (control) and Cre (KO), harvested at ZT22 and ZT10.
