# Supplementary material for: The hepatic circadian clock fine-tunes the lipogenic response to feeding through RORα/γ
Source: PubMed Central journal article supplement — Genes Dev. 2017 Jun 15;31(12):1202–11. doi: 10.1101/gad.302323.117 (PMC5558923; doi:10.1101/gad.302323.117), 2017-06-15
Supplement: supp_gad.302323.117_Supplemental_Fig_S2.pdf [file supp_gad.302323.117_Supplemental_Fig_S2.pdf]

**Figure S2**

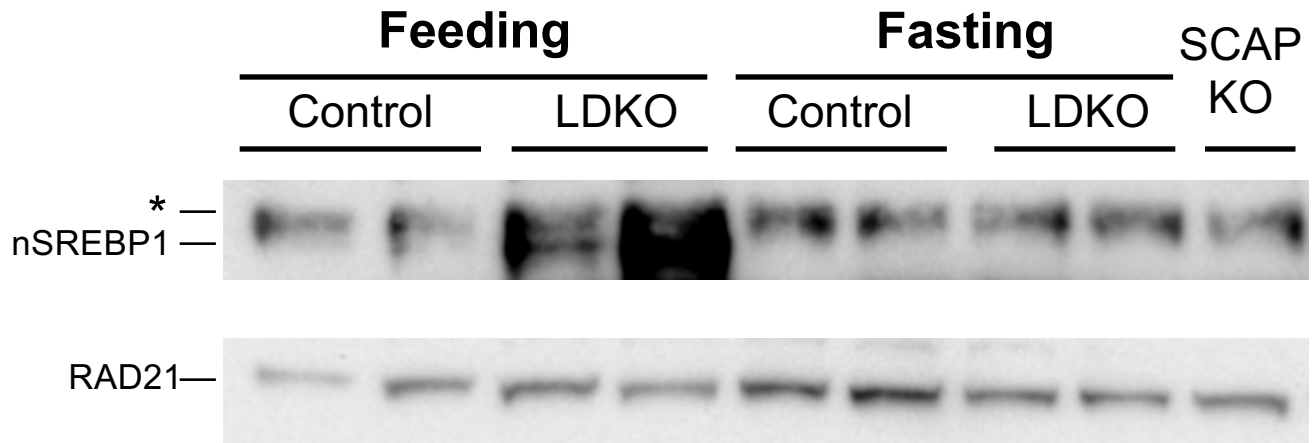

**Supplemental Fig. 2. Activation of SREBP1 in ROR LDKO Liver at ZT22 in Fed, But Not Fasted, State .** Western blot of active form of nuclear SREBP1, and loading control RAD21 in the liver of *Rora<sup>fl/fl</sup>/Rorc<sup>fl/fl</sup>* mice injected with GFP (control) and Cre (KO), fed a high fat diet for 6 weeks, and harvested at ZT22. The liver lysate of *Scap<sup>fl/fl</sup>* mice injected with Cre (SCAP KO) was used as negative control for nSREBP1. "\*" denotes non-specific band.
